# Supplementary material for: Pembrolizumab Activity in Recurrent High-Grade Gliomas with Partial or Complete Loss of Mismatch Repair Protein Expression: A Monocentric, Observational and Prospective Pilot Study
Source: PubMed Central journal article supplement (PMC7464918; doi:10.3390/cancers12082283), 2020-08-14
Supplement: cancers-12-02283-s001.pdf [file cancers-12-02283-s001.pdf]

# Supplement Materials: Pembrolizumab Activity in Recurrent High-Grade Gliomas with Partial or Complete Loss of Mismatch Repair Protein Expression: A Monocentric, Observational and Prospective Pilot Study

## Methods S1.

### *Mutational and Copy Number Variation Status*

DNA was obtained from tumor and matched non-neoplastic brain (surrounding the tumor and showing no microscopic neoplastic infiltration) using 10 consecutive formalin-fixed paraffin-embedded (FFPE) 4- $\mu$ m sections and the QIAamp DNA FFPE Tissue Kit (Qiagen). DNA was qualified as reported elsewhere<sup>1</sup>.

Two different targeted next-generation sequencing (NGS) panels were used. The first was the OncoPrint Tumor Mutational Load (TML) assay (ThermoFisher), which covers 1.65 Mb of genomic space for the assessment of tumor mutational burden and includes all exons of 409 cancer-related genes for mutational and copy number assessment. This gene panel has been reported to have 0.99 Pearson correlation with whole exome sequencing in the assessment of TMB (Budczies et al. Ann Oncol. 2019; 30(9):1496-1506; PMID: 32119917). The second was a custom panel named ACC GBM panel, which was designed with the contribution of the Italian Alliance Against Cancer (ACC) and explores the mutational asset of 53 glioma-associated genes including: ACVR1, AKT1, ASCL1, ATRX, BRAF, CDK4, CDK6, CDKN2A, CDKN2B, CIC, DAXX, EGFR, EPCAM, FGFR1, FGFR2, FGFR3, FUBP1, H3F3A, IDH1, IDH2, KIAA1549, LTBP4, LZTR1, MDM2, MDM4, MET, MLH1, MLH3, MSH2, MSH4, MSH5, MSH6, MYCN, NDRG1, NF1, NF2, NFKBIA, NOTCH1, PDGFRA, PIKCA, PIKER1, PMS1, PMS2, POLD1, POLE, PTEN, RB1, SMARCA4, SMARCB1, SPRED1, TACC3, TERT, TP53.

Libraries for TML assay were prepared using 20ng tumor DNA and sequenced on the Ion S5XL system (ThermoFisher) loaded with Ion 540 chip as described<sup>2</sup>. Reads alignment to the hg19 human reference genome and variant calling, was done using Torrent Suite Software v.5.10 (ThermoFisher).

Libraries for ACC GBM panel were prepared using 150 ng tumor DNA and the SureSelect XT High Sensitivity protocol (Agilent Technologies, Santa Clara, USA) and sequenced on Illumina MiSeq. Reads alignment to human genome hg19 and variant calling was performed using the OncoKDM algorithm (OncoDNA S.A., Gosselies, Belgium), which allows to identify both single nucleotide substitutions and copy number variations.

### *Tumor mutational burden and mutational signatures*

Tumor mutational burden and mutational spectrum were evaluated using the OncoPrint TML 5.10 plugin available on IonReporter software (ThermoFisher). Default Modified parameters were used according to manufacturer's protocol in order to exclude false positive results due to sequencing artefacts. A threshold of at least 20 reads and a variant allelic frequency of at least 10% were used to perform mutation calling. Additional technical details have been described elsewhere<sup>2</sup>.

### *Microsatellite instability*

Microsatellite instability was assessed using the Titano Kit (DiatechPharmacogenetics), which analyzes 6 poly-A microsatellites (BAT25, BAT26, BAT40, NR21, NR24, TGF $\beta$ RII) and 4 dinucleotide markers (D2S123, D17S250, D5S346, D18S58).

### *MGMT methylation status*

MGMT promoter methylation status was analyzed by pyrosequencing using a commercial kit (MGMT plus, Diatech Pharmacogenetics) on a PyroMark Q96 ID system equipped with PyroMark CpG (Qiagen) software.

#### PD-L1 and MHC-1 immunohistochemistry

Immunohistochemistry with anti-PD-L1 (clone 22C3; Dako) and anti-MHC class I (clone ES05; Dako) primary antibodies was performed using the BOND-MAX system (Leica Biosystems). Immunostainings were jointly assessed by two pathologists.

#### Macrophage and CD8+ cell density analyses

A multispectral imaging analysis was performed on 4µm FFPE tissue slides, using three markers: CD8 (clone C8/144B, Termofisher Scientific), which recognizes cytotoxic T lymphocytes, CD68 for the total macrophage fraction (clone PG-M1, Dako Agilent), and glial fibrillary acidic protein GFAP (clone EP672Y, AbCam) as a tissue architecture marker. The DAPI (Spectral Dapi, Akoya Biosciences) nuclear counterstain was optimized in order to gain a multicomponent view of the cellular infiltrate. The stained tissue slide was accompanied by an unstained control slide to subtract the background tissue autofluorescence signal. Images were acquired with the Mantra multispectral imaging platform (Akoya Biosciences) at 20x magnification. Analysis was performed using InForm 2.4.1 software (Akoya Biosciences). Cell density/mm<sup>2</sup> was chosen as the election parameter to quantitatively characterize the immune cell infiltrate.

## References

1. Simbolo, M.; Gottardi, M.; Corbo, V.; Fassan, M.; Mafficini, A.; Malpeli, G.; Lawlor, R.T.; Scarpa, A. DNA qualification workflow for next generation sequencing of histopathological samples. *PLoS One* **2013**, *8*, e62692. doi:10.1371/journal.pone.0062692
2. Barresi V, Simbolo M, Mafficini A, et al. Ultra-Mutation in IDH Wild-Type Glioblastomas of Patients Younger than 55 Years is Associated with Defective Mismatch Repair, Microsatellite Instability, and Giant Cell Enrichment. *Cancers* **2019**, *11*, doi:10.3390/cancers11091279

**Table S1.** Baseline patient characteristics.

| Characteristics          | N (%)           |
|--------------------------|-----------------|
| Patients                 | 13              |
| Median Age               | 43(range 21-65) |
| Gender                   |                 |
| Male                     | 7 (54)          |
| Female                   | 6 (46)          |
| ECOG PS                  |                 |
| 0                        | 3 (23)          |
| 1                        | 9 (69)          |
| 2                        | 1 (8)           |
| Histology                |                 |
| Anaplastic Astrocytoma   | 4 (31)          |
| Anaplastic ODG           | 1 (8)           |
| Glioblastoma             | 8 (61)          |
| Surgery at recurrence    | 9 (69)          |
| Prior RT                 | 13 (100)        |
| Median previous CT lines | 2 (range 1-5)   |
| Temozolomide             | 13 (100)        |
| Steroids                 |                 |
| Yes                      | 5 (38)          |
| No                       | 8 (62)          |
| MGMT status              |                 |
| Methylated               | 9 (69)          |
| Unmethylated             | 4 (31)          |

|                   |        |
|-------------------|--------|
| <i>IDH</i> status |        |
| Wild-type         | 9 (69) |
| Mutated           | 4 (31) |

ECOG PS: Eastern Cooperative Oncology Group Performance Status; ODG: oligodendroglioma; RT: radiation therapy; CT: chemotherapy.

**Table S2.** Patient immune-molecular characteristics.

| Characteristics                  | N (%)                                      |
|----------------------------------|--------------------------------------------|
| Status of MMR protein expression |                                            |
| Complete loss of MSH6+MSH2       | 1 (8)                                      |
| Complete loss of MSH6            | 1 (8)                                      |
| Partial loss of MSH6+MSH2        | 6 (46)                                     |
| Partial loss of MLH1+PMS2        | 2 (15)                                     |
| Partial loss of MSH6             | 1 (8)                                      |
| Partial loss of MSH2             | 2 (15)                                     |
| Tumoral MMR gene mutations       |                                            |
| MSH6                             | 1 (8)                                      |
| Microsatellite Status            |                                            |
| Stable (MSS)                     | 13 (100)                                   |
| Median PD-L1 expression          | 0% (range 0-5)                             |
| Median TMB*                      | 10.02 mutations/megabase (range 6.8-26.89) |
| Median MHC-1 expression*         | 60% (range 0-95)                           |
| Median macrophage density*       | 423.85/mm <sup>2</sup> (range 108.9-971.2) |
| Median CD8 <sup>+</sup> density* | 25.9/mm <sup>2</sup> (range 0-90.7)        |

MMR: mismatch repair; MSS: microsatellite stable; TMB: tumor mutational burden; \* analyzed in 12 pts

**Table S3.** Summary of gene alterations identified by sequencing analysis of 12 glioma cases.

| Gene              | n | %    | M | N | F | S | A | HD |
|-------------------|---|------|---|---|---|---|---|----|
| AKT2              | 1 | 8,3  |   |   | 1 |   |   |    |
| ATRX              | 1 | 8,3  |   |   | 1 |   |   |    |
| CDK4              | 1 | 8,3  |   |   |   |   | 1 |    |
| CDKN2A/B          | 6 | 50,0 |   |   |   |   |   | 6  |
| EGFR              | 2 | 16,7 |   |   |   |   | 2 |    |
| FGFR2             | 1 | 8,3  | 1 |   |   |   |   |    |
| IDH1              | 4 | 33,3 | 4 |   |   |   |   |    |
| KDR               | 1 | 8,3  |   |   |   |   | 1 |    |
| KIT               | 1 | 8,3  |   |   |   |   | 1 |    |
| MDM4              | 1 | 8,3  |   |   |   |   | 1 |    |
| MSH6              | 1 | 8,3  |   | 1 |   |   |   |    |
| NF1               | 2 | 16,7 | 1 |   |   | 1 |   |    |
| PDGFRA            | 1 | 8,3  |   |   |   |   | 1 |    |
| PIK3C2B           | 1 | 8,3  |   |   |   |   | 1 |    |
| PIK3R1            | 1 | 8,3  |   | 1 |   |   |   |    |
| PIK3R2            | 1 | 8,3  | 1 |   |   |   |   |    |
| PMS1              | 1 | 8,3  | 1 |   |   |   |   |    |
| PTEN              | 1 | 8,3  | 1 |   |   |   |   |    |
| PTPN11            | 2 | 16,7 | 2 |   |   |   |   |    |
| RB1               | 1 | 8,3  |   | 1 |   |   |   |    |
| RET               | 2 | 16,7 | 2 |   |   |   |   |    |
| TP53 <sup>^</sup> | 8 | 66,7 | 8 |   | 1 |   |   |    |

Note: n: number cases affected; %: mutation rate estimated on 12 cases; M: missense mutation; N: nonsense mutation; F: frameshift; S: splice site alteration; A: amplification (>4 gene copies); HD: homozygous deletion. ^ One cases showed biallelic missense mutation.

**Table S4.** Associations of molecular and immunological variables with disease control rate.

| Variable                               | <i>p</i> Value |
|----------------------------------------|----------------|
| Loss of (yes vs no)                    |                |
| MSH2                                   | 0.7            |
| MSH6                                   | 0.4            |
| PMS2                                   | 0.5            |
| MLH1                                   | 0.5            |
| MMR protein loss (complete vs partial) | 0.9            |
| MGMT status (met vs unmet)             | 0.2            |
| IDH status (mut vs wt)                 | 0.9            |
| TP53*                                  | 0.6            |
| CDKN2A/B*                              | 0.7            |
| NF1*                                   | 0.2            |
| TMB*°                                  | 0.5            |
| MHC-1 expression*°                     | 0.9            |
| Macrophage density*°                   | 0.9            |
| CD8 <sup>+</sup> density*°             | 0.9            |

\*analyzed in 12 patients; comparison of median values between group of patients with stable disease and progressive disease (Mann-Whitney tests).

| ID     | GENE   | CHROM | POS       | REF     | ALT   | var_freq | Status   | Existing_variation | Feature        | Consequence             | HGVSc                        | HGVSp                           | EXON  | INTRON | CLIN_SIG               |
|--------|--------|-------|-----------|---------|-------|----------|----------|--------------------|----------------|-------------------------|------------------------------|---------------------------------|-------|--------|------------------------|
| 1PD    | TP53   | chr17 | 7577121   | G       | A     | 63       | somatic  | rs121913343        | NM_000546.5    | missense_variant        | NM_000546.5:c.817C>T         | NP_000537.3:p.Arg273Cys         | 8/11  |        | pathogenic             |
| 2PD    | TP53   | chr17 | 7577536   | T       | C     | 19       | somatic  | rs587782082        | NM_000546.5    | missense_variant        | NM_000546.5:c.745A>G         | NP_000537.3:p.Arg249Gly         | 7/11  |        | likely_pathogenic      |
| 2PD    | NF1    | chr17 | 29509525  | G       | T     | 12       | somatic  | COSM6910666        | XM_005257983.1 | splice_acceptor_variant | XM_005257983.1:c.731-1G>T    |                                 |       | 7/58   |                        |
| 3PD    | TP53   | chr17 | 7576896   | TG      | T     | 87       | somatic  | COSM10786          | NM_000546.5    | frameshift_variant      | NM_000546.5:c.949del         | NP_000537.3:p.Gln317SerfsTer28  | 9/11  |        |                        |
| 3PD    | NF1    | chr17 | 29653118  | CTTGT   | TTTGT | 86       | germline | rs769087878        | XM_005257983.1 | missense_variant        | XM_005257983.1:c.5116delinsT | XP_005258040.1:p.Leu1706Phe     | 37/59 |        |                        |
| 3PD    | RBI    | chr13 | 48955394  | C       | T     | 64       | somatic  | rs886043247        | NM_000321.2    | stop_gained             | NM_000321.2:c.1510C>T        | NP_000312.2:p.Gln504Ter         |       |        | pathogenic             |
| 4PD    | TP53   | chr17 | 7577094   | G       | A     | 21       | somatic  | rs28934574         | NM_000546.5    | missense_variant        | NM_000546.5:c.844C>T         | NP_000537.3:p.Arg282Trp         | 8/11  |        | pathogenic             |
| 5PD    | IDH1   | chr2  | 209113113 | G       | T     | 27       | somatic  | rs121913499        | NM_001282387.1 | missense_variant        | NM_001282387.1:c.394C>A      | NP_001269316.1:p.Arg132Ser      | 4/10  |        | pathogenic             |
| 5PD    | TP53   | chr17 | 7577091   | G       | A     | 51       | somatic  | rs149633775        | NM_000546.5    | missense_variant        | NM_000546.5:c.847C>T         | NP_000537.3:p.Arg283Cys         | 8/11  |        | likely_pathogenic      |
| 5PD    | TP53   | chr17 | 7578266   | T       | A     | 25       | somatic  | rs942158624        | NM_000546.5    | missense_variant        | NM_000546.5:c.583A>T         | NP_000537.3:p.Ile195Phe         | 6/11  |        | likely_pathogenic      |
| 5PD    | ATRX   | chrX  | 76939464  | ATTTTTC | ATTTT | 31       | somatic  |                    | NM_000489.3    | frameshift_variant      | NM_000489.3:c.1278_1279del   | NP_000480.2:p.Asn428TyrfsTer5   | 9/35  |        |                        |
| 9PD    | IDH1   | chr2  | 209113112 | C       | T     | 31       | somatic  | rs121913500        | NM_001282387.1 | missense_variant        | NM_001282387.1:c.395G>A      | NP_001269316.1:p.Arg132His      | 4/10  |        | pathogenic             |
| 9PD    | TP53   | chr17 | 7578271   | T       | C     | 77       | somatic  | rs786201838        | NM_000546.5    | missense_variant        | NM_000546.5:c.578A>G         | NP_000537.3:p.His193Arg         | 6/11  |        | likely_pathogenic      |
| 9PD    | ATRX   | chrX  | 76888721  | ATTTC   | A     | 32       | somatic  | COSM1716708        | NM_000489.3    | frameshift_variant      | NM_000489.3:c.5104_5107del   | NP_000480.2:p.Glu1702TyrfsTer22 | 19/35 |        |                        |
| 9PD    | PMS1   | chr2  | 190708712 | G       | A     | 41       | germline | rs2066459          | XM_005246648.1 | missense_variant        | XM_005246648.1:c.605G>A      | XP_005246705.1:p.Arg202Lys      | 6/13  |        | uncertain_significance |
| 10PD   | PTEEN  | chr10 | 89692917  | T       | C     | 50       | somatic  | rs1085308046       | NM_000314.4    | missense_variant        | NM_000314.4:c.401T>C         | NP_000305.3:p.Met134Thr         | 5/9   |        | pathogenic             |
| 12PD   | PTPN11 | chr12 | 112888165 | G       | T     | 45       | germline | rs397507510        | NM_001330437.1 | missense_variant        | NM_001330437.1:c.181G>T      | NP_001317366.1:p.Asp61Tyr       | 3/16  |        | pathogenic             |
| 13_1PD | RET    | chr10 | 43607561  | GC      | GG    | 50       | germline | rs149238501        | NM_020975.4    | missense_variant        | NM_020975.4:c.1538delinsG    | NP_066124.1:p.Ala513Gly         | 8/20  |        | uncertain_significance |
| 16PD   | IDH1   | chr2  | 209113112 | C       | T     | 60       | somatic  | rs121913500        | NM_001282387.1 | missense_variant        | NM_001282387.1:c.395G>A      | NP_001269316.1:p.Arg132His      | 4/10  |        | pathogenic             |
| 16PD   | TP53   | chr17 | 7577538   | C       | T     | 91       | somatic  | rs11540652         | NM_000546.5    | missense_variant        | NM_000546.5:c.743G>A         | NP_000537.3:p.Arg248Gln         | 7/11  |        | pathogenic             |
| 17PD   | AKT2   | chr19 | 40742182  | CG      | T     | 31       | somatic  |                    | NM_001626.4    | frameshift_variant      | NM_001626.4:c.941_942delinsA | NP_001617.1:p.Pro314GlnfsTer30  | 10/14 |        |                        |
| 17PD   | FGFR2  | chr10 | 123246934 | C       | T     | 67       | somatic  |                    | NM_022970.3    | missense_variant        | NM_022970.3:c.1994G>A        | NP_075259.4:p.Arg665Gln         | 15/18 |        |                        |
| 17PD   | MSH6   | chr2  | 48027965  | AAC     | A     | 60       | somatic  |                    | NM_000179.2    | frameshift_variant      | NM_000179.2:c.2845_2846del   | NP_000170.1:p.Gln949GlufsTer16  | 4/10  |        |                        |
| 17PD   | PIK3R2 | chr19 | 18273784  | G       | A     | 18       | somatic  | rs587776934        | NM_005027.3    | missense_variant        | NM_005027.3:c.1117G>A        | NP_005018.1:p.Gly373Arg         | 10/16 |        | pathogenic             |
| 17PD   | PTPN11 | chr12 | 112884103 | G       | A     | 22       | somatic  | COSM430369         | NM_002834.3    | missense_variant        | NM_002834.3:c.38G>A          | NP_002825.3:p.Gly13Asp          | 2/16  |        |                        |
| 17PD   | TP53   | chr17 | 7577538   | C       | T     | 31       | somatic  | rs11540652         | NM_000546.5    | missense_variant        | NM_000546.5:c.743G>A         | NP_000537.3:p.Arg248Gln         | 7/11  |        | pathogenic             |
| 17PD   | PIK3R1 | chr5  | 67522831  | C       | T     | 29       | somatic  |                    | NM_181523.2    | stop_gained             | NM_181523.2:c.328C>T         | NP_852664.1:p.Gln110Ter         | 2/16  |        |                        |
| 18PD   | IDH1   | chr2  | 209113112 | C       | T     | 12       | somatic  | rs121913500        | NM_001282387.1 | missense_variant        | NM_001282387.1:c.395G>A      | NP_001269316.1:p.Arg132His      | 4/10  |        | pathogenic             |
| 18PD   | RET    | chr10 | 43620335  | C       | T     | 49       | germline | rs17158558         | NM_020975.4    | missense_variant        | NM_020975.4:c.2944C>T        | NP_066124.1:p.Arg982Cys         | 18/20 |        | pathogenic             |

Figure S1. List of somatic and germline mutations identified in all 12 cases analyzed by next generation sequencing of 409 genes using the TML panel.
